# Supplementary material for: Organophosphonic acids as viable linkers for the covalent attachment of polyelectrolyte brushes on silica and mica surfaces
Source: Royal Society of Chemistry journal article supplement (doi:10.1039/c4py00492b), 2014-01-01
Supplement: c4py00492b1.pdf [file c4py00492b1.pdf]

**SUPPORTING INFORMATION**

**Organophosphonic acids as viable linkers for the covalent  
attachment of polyelectrolyte brushes on silica and mica surfaces**

*Olga Borozenko,<sup>1</sup> Vivian Machado<sup>2</sup>, W. G. Skene<sup>1\*</sup> and Suzanne Giasson<sup>1,2\*</sup>*

<sup>1</sup>Department of Chemistry and <sup>2</sup>Faculty of Pharmacy, Université de Montréal, C.P. 6128,  
succursale Centre-Ville, Montréal, QC, Canada, H3C 3J7

## Table of Contents

|                                                                                                                                                                                                              |    |
|--------------------------------------------------------------------------------------------------------------------------------------------------------------------------------------------------------------|----|
| Figure S1. Synthetic scheme for the preparation of phosphonic initiator ( <b>5</b> ).....                                                                                                                    | 3  |
| Figure S2. <sup>1</sup> H NMR spectrum of <b>1</b> in chloroform. ....                                                                                                                                       | 4  |
| Figure S3. Mass spectrum of <b>1</b> . ....                                                                                                                                                                  | 5  |
| Figure S4. <sup>1</sup> H NMR spectrum of <b>2</b> in chloroform. ....                                                                                                                                       | 6  |
| Figure S5. <sup>13</sup> C NMR spectrum of <b>2</b> in chloroform. ....                                                                                                                                      | 7  |
| Figure S6. Mass spectrum of <b>2</b> . ....                                                                                                                                                                  | 8  |
| Figure S7. <sup>1</sup> H NMR spectrum <b>3</b> in chloroform.....                                                                                                                                           | 9  |
| Figure S8. <sup>13</sup> C NMR spectrum of <b>3</b> in chloroform. ....                                                                                                                                      | 10 |
| Figure S9. Mass spectrum of <b>3</b> . ....                                                                                                                                                                  | 11 |
| Figure S10. <sup>1</sup> H NMR spectrum of <b>4</b> in chloroform. ....                                                                                                                                      | 12 |
| Figure S11. <sup>13</sup> C NMR spectrum of <b>4</b> in chloroform. ....                                                                                                                                     | 13 |
| Figure S12. Mass spectrum of <b>4</b> . ....                                                                                                                                                                 | 14 |
| Figure S13. <sup>1</sup> H NMR spectrum of <b>5</b> in chloroform. ....                                                                                                                                      | 15 |
| Figure S14. <sup>13</sup> C NMR spectrum of <b>5</b> in chloroform. ....                                                                                                                                     | 16 |
| Figure S15. Mass spectrum of <b>5</b> . ....                                                                                                                                                                 | 17 |
| Figure S16. High resolution mass spectrum of <b>5</b> .....                                                                                                                                                  | 18 |
| Figure S17. High resolution mass spectra of freshly synthesized <b>5</b> (B) after 5 recycling cycles. 19                                                                                                    |    |
| Figure S18. Theoretically calculated length of PI after energy minimization using Chem3D<br>option MM2, with a RMS gradient of 0.100. ....                                                                   | 20 |
| Figure S19. PAA (A) and PSPMA (B) brushes on silica. Polymer grafting reaction was<br>performed with the conventional (siloxane) initiator. Thickness of PAA layer = 120 nm and<br>PSPMA layer =156 nm. .... | 21 |
| Figure S20. Degrafting studies of PAA brushes synthesized from PI-modified silica wafer.<br>(thickness of PAA layer in air = 20nm).....                                                                      | 22 |

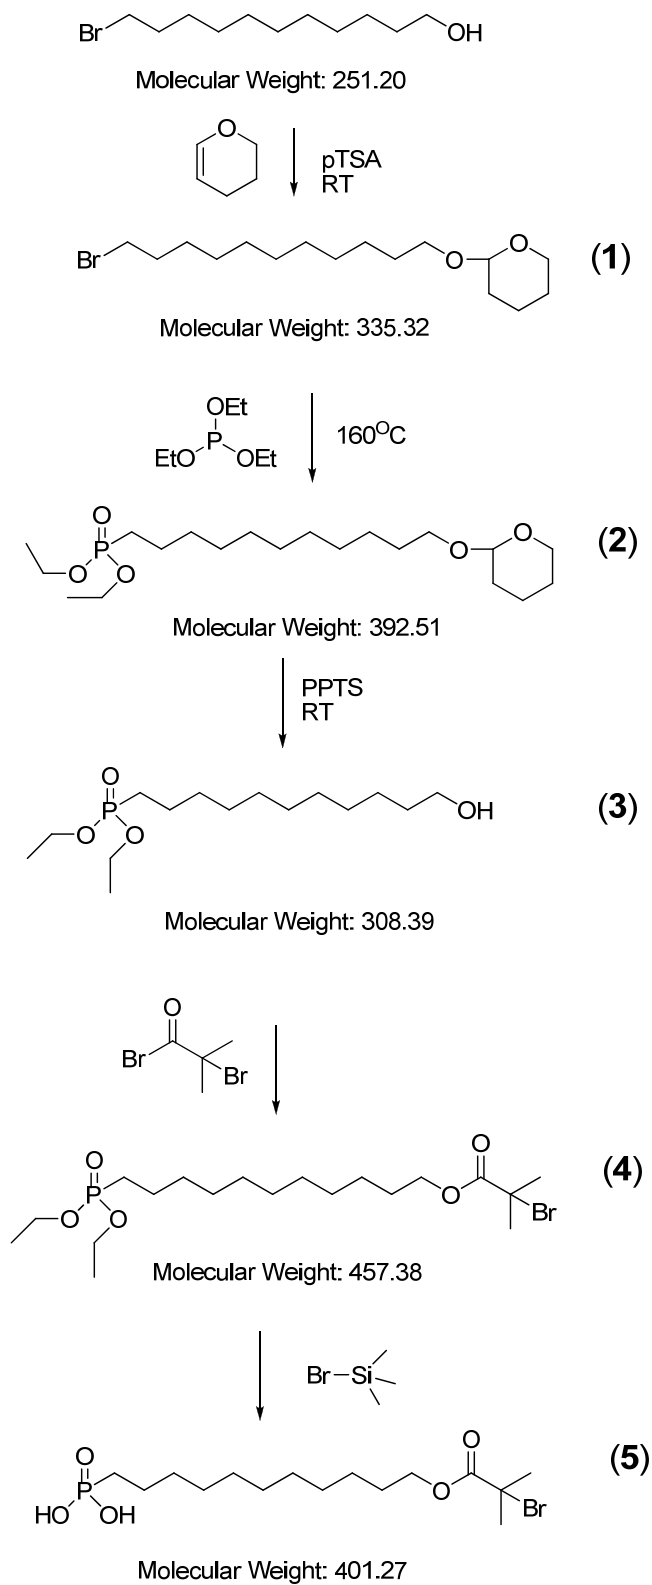

Figure S1. Synthetic scheme for the preparation of phosphonic initiator (5).

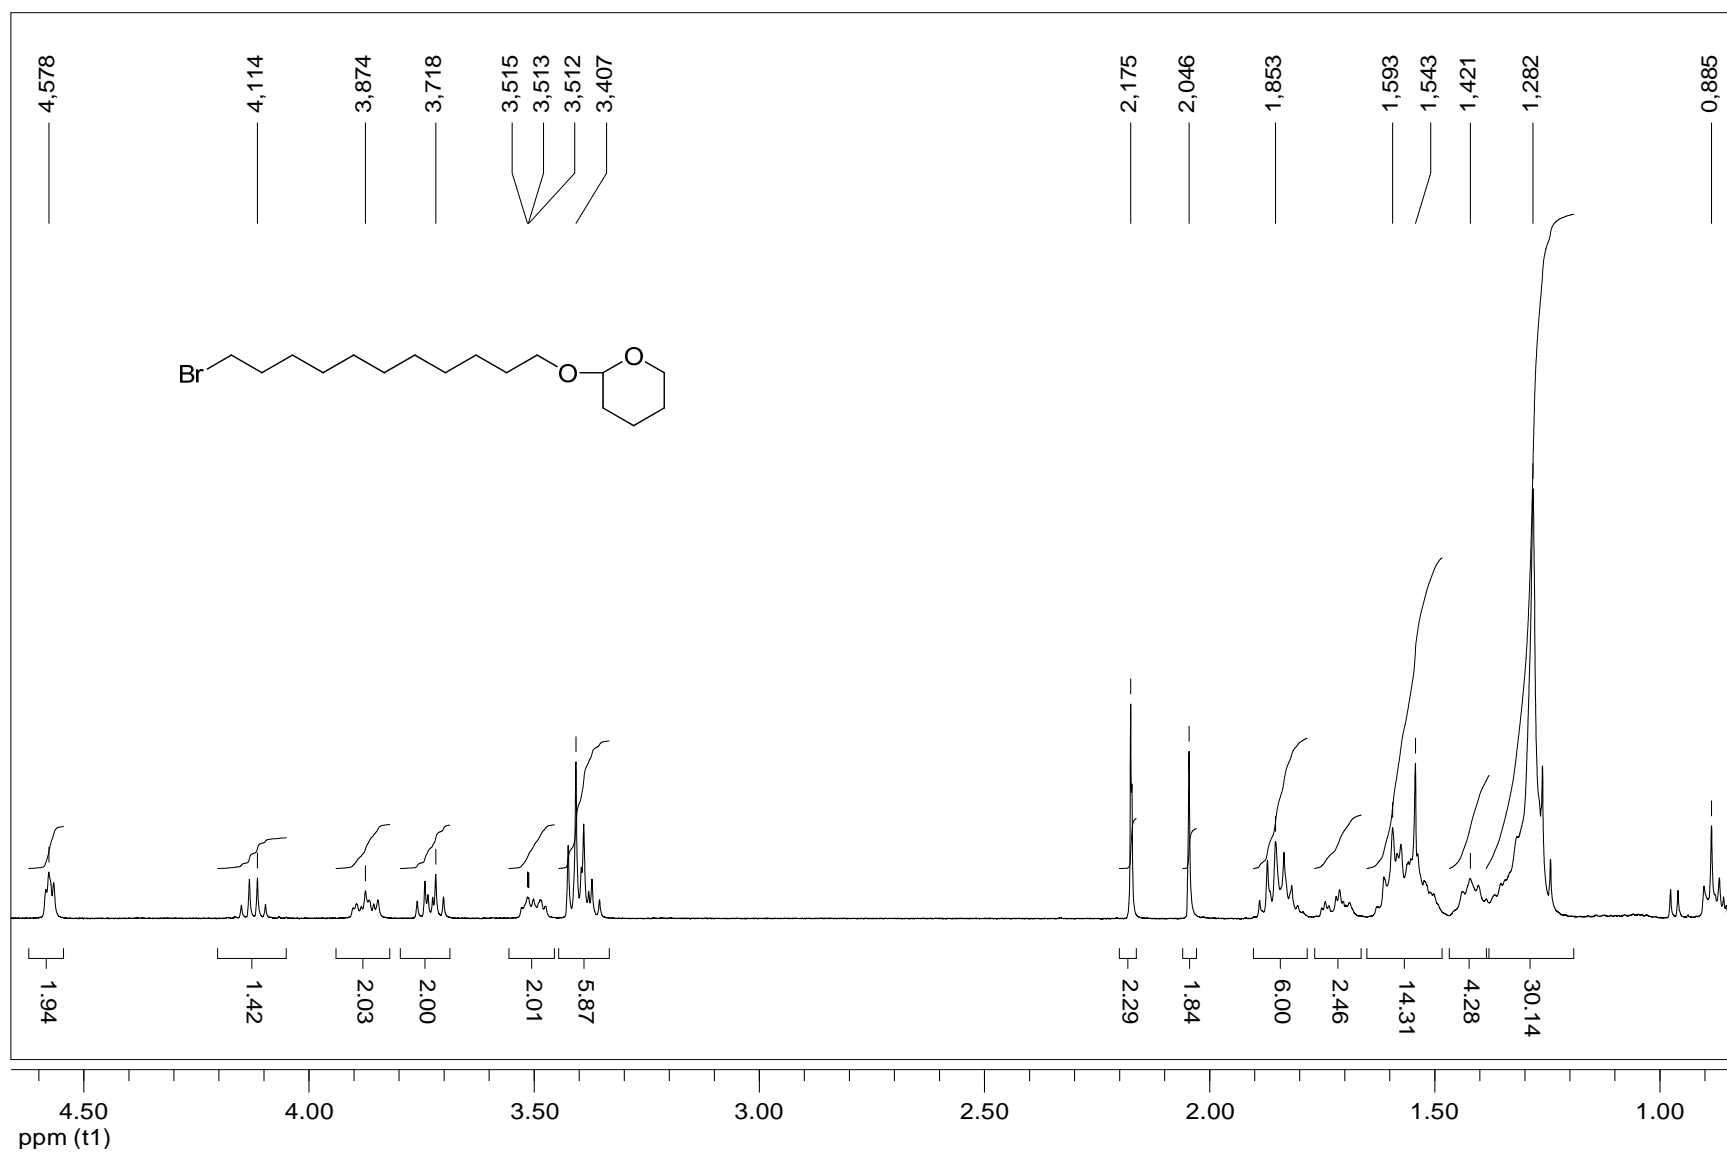

Figure S2. <sup>1</sup>H NMR spectrum of **1** in chloroform.

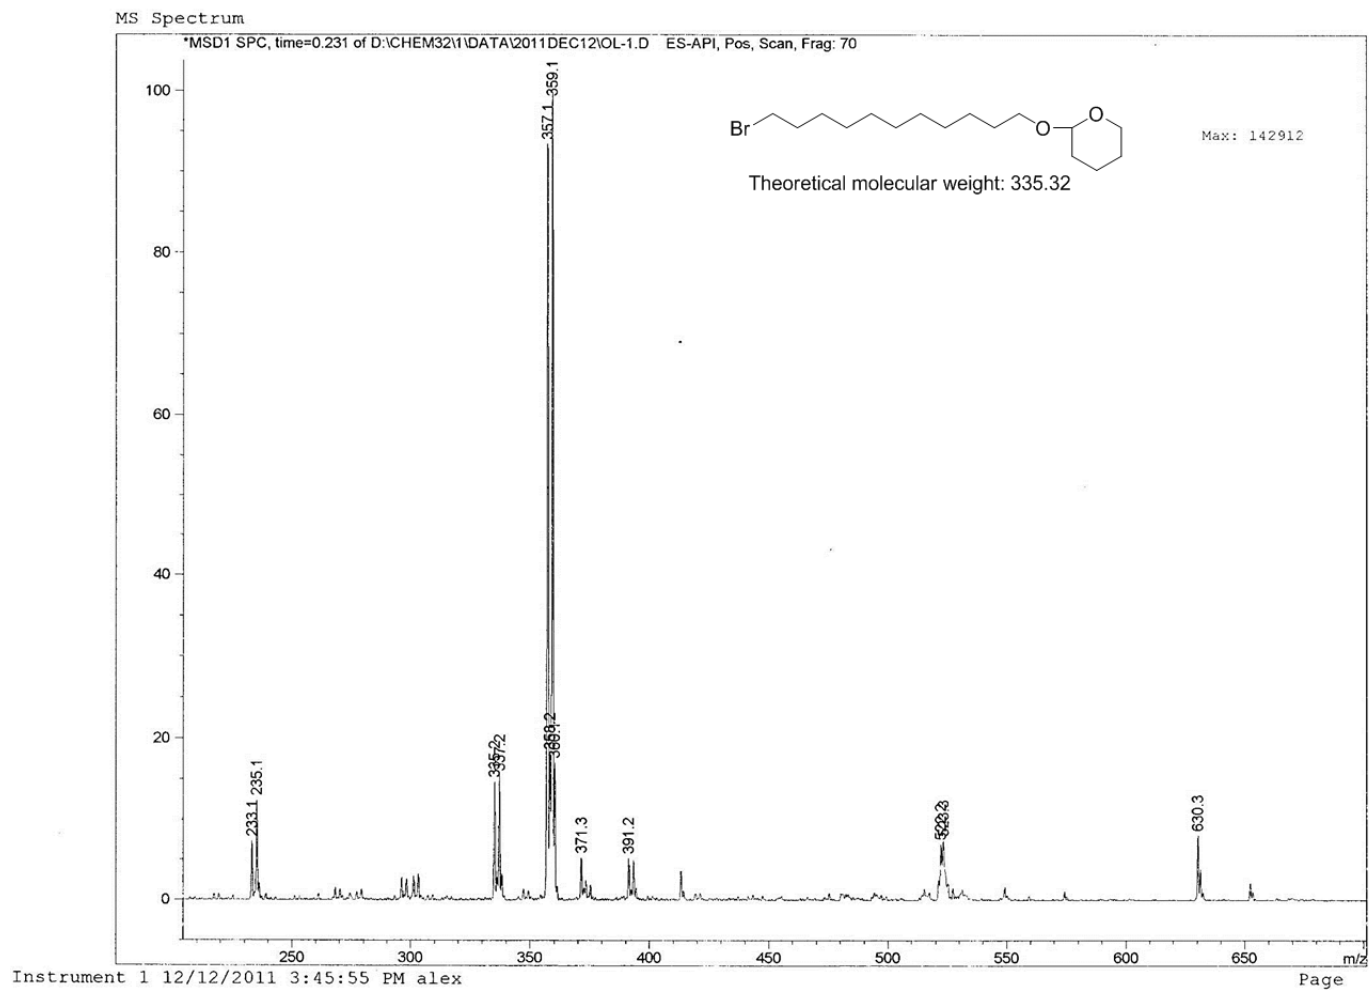

Figure S3. Mass spectrum of **1**.

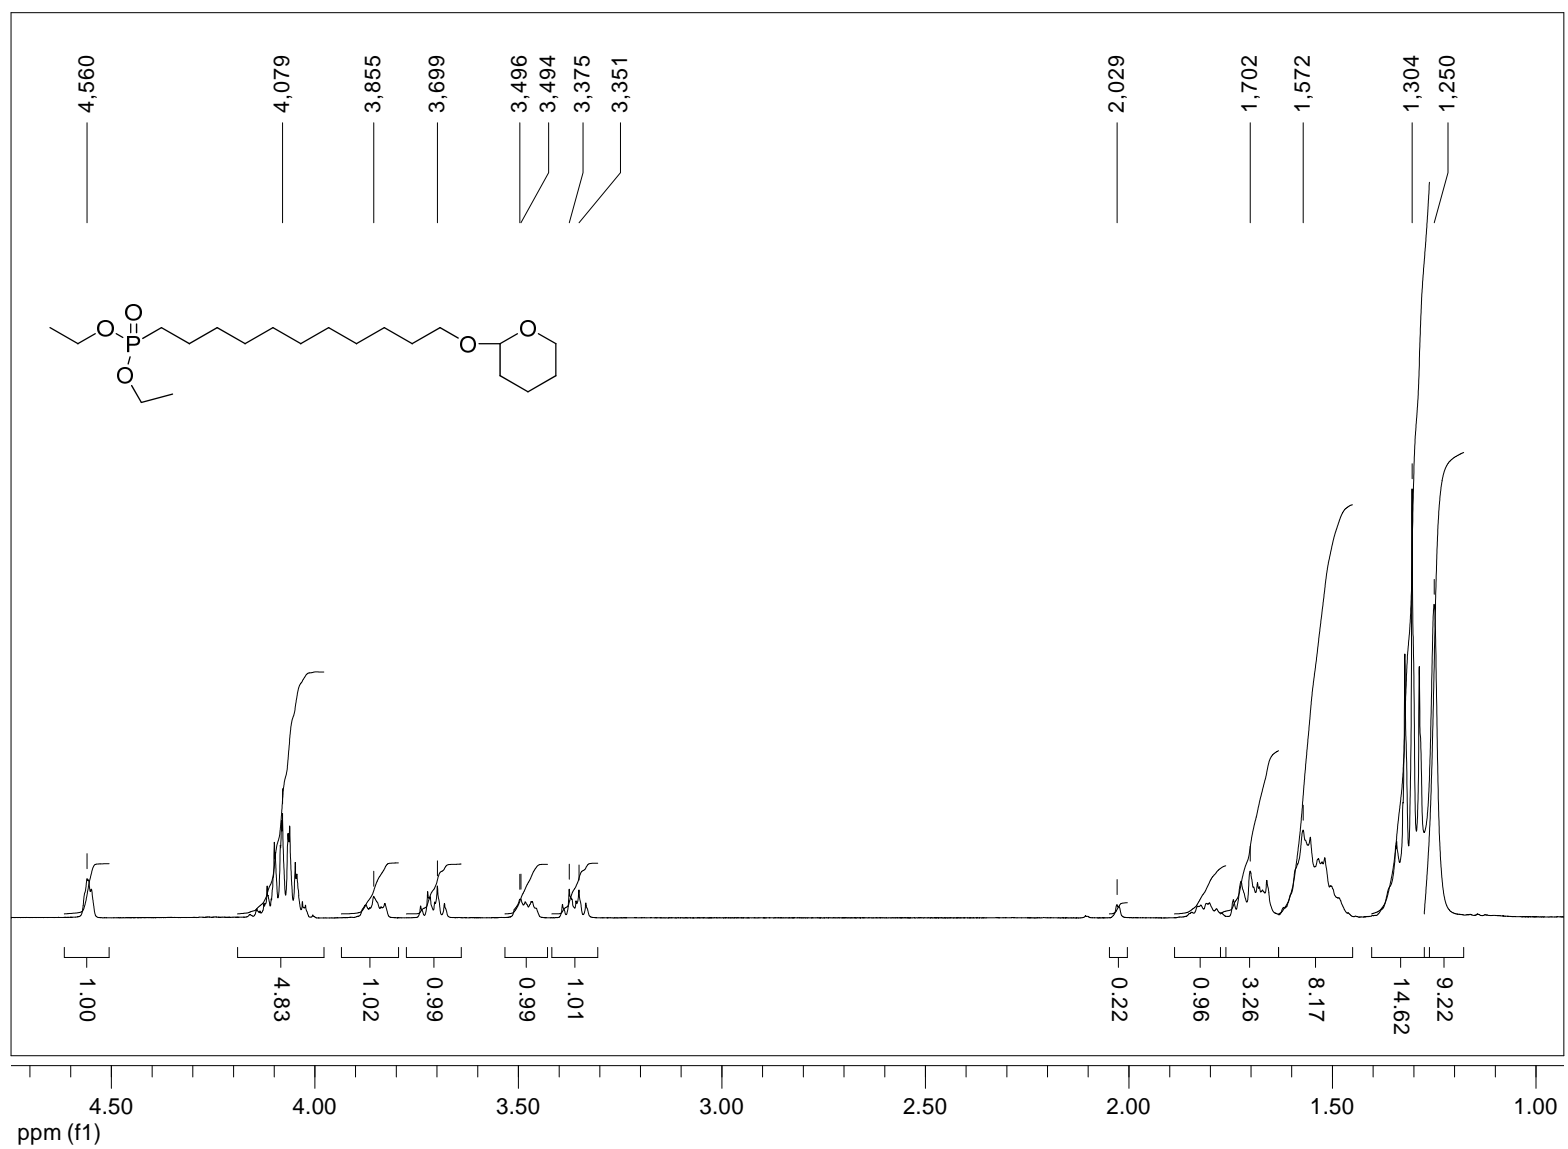

Figure S4.  $^1\text{H}$  NMR spectrum of **2** in chloroform.

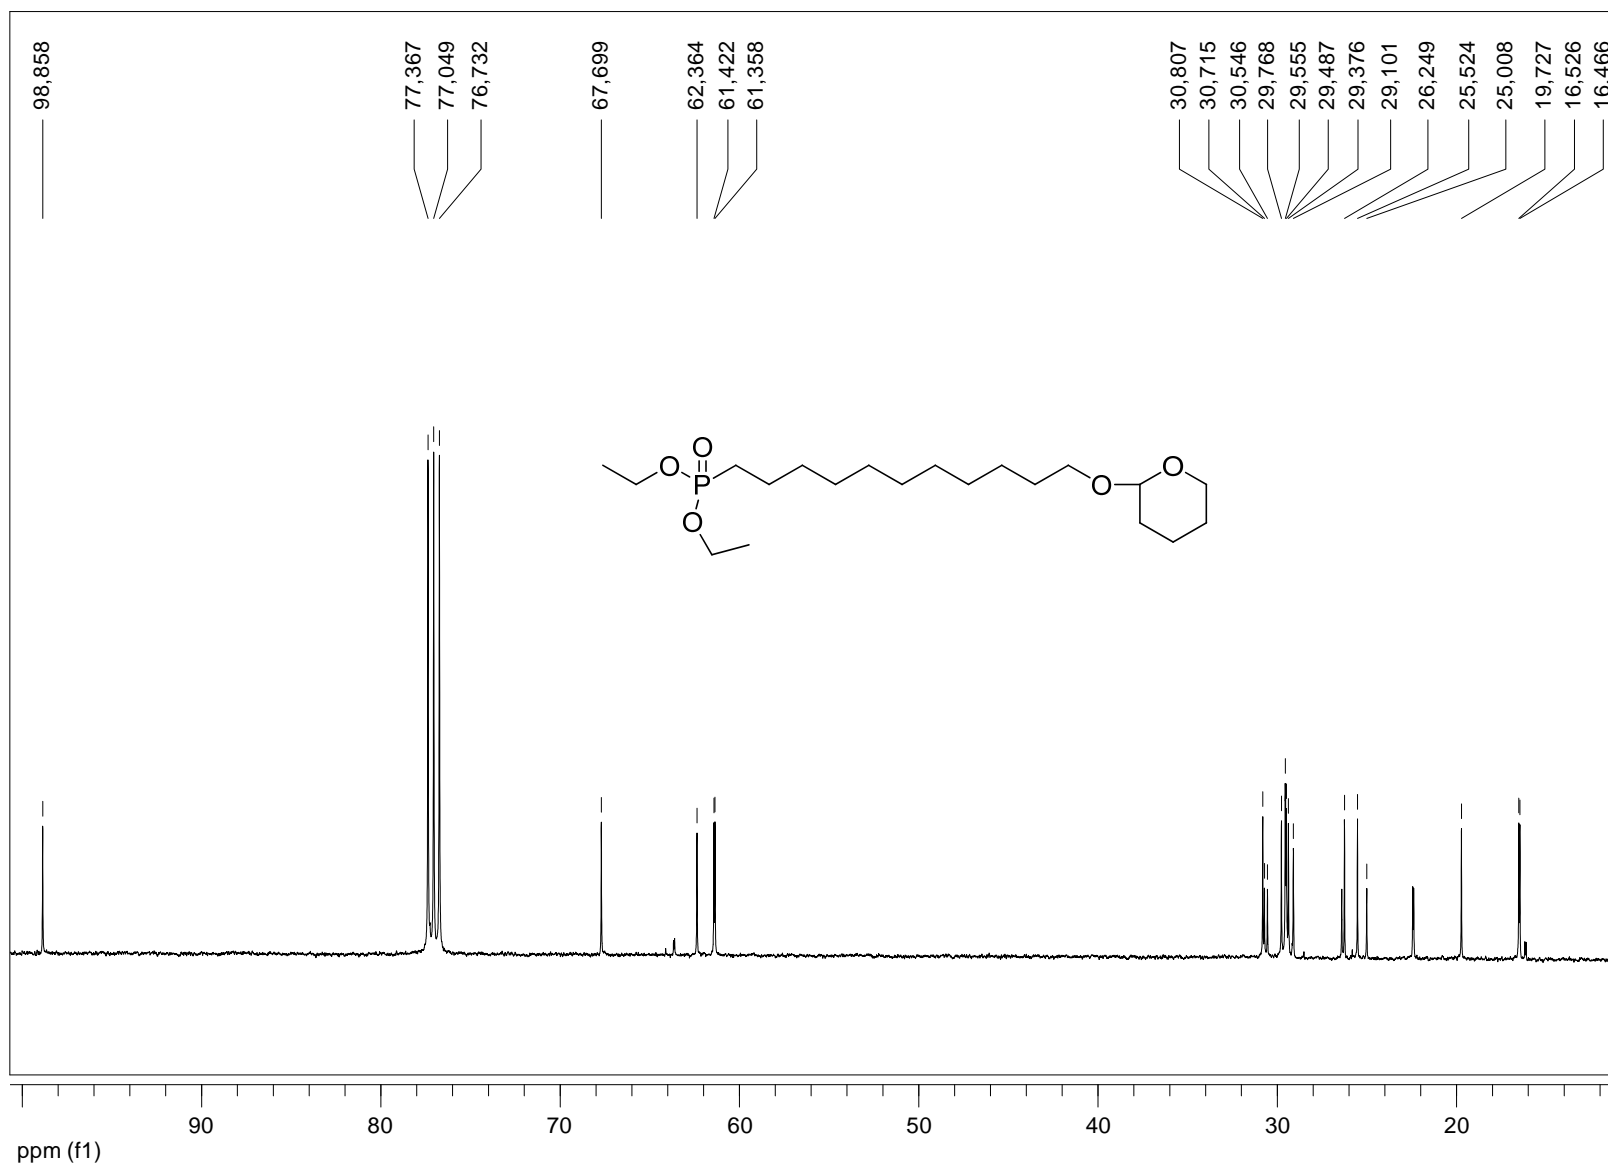

Figure S5.  $^{13}\text{C}$  NMR spectrum of **2** in chloroform.

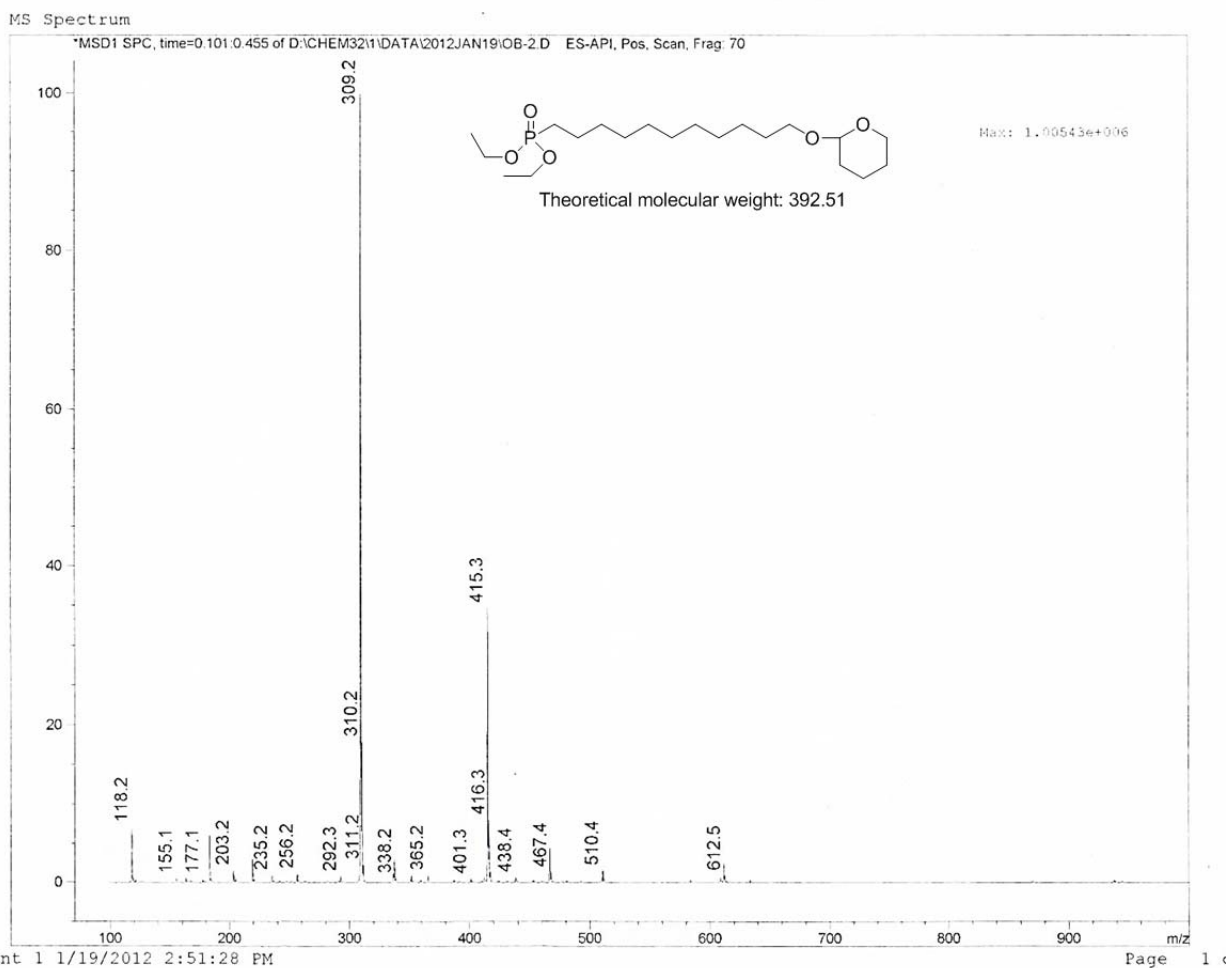

Figure S6. Mass spectrum of 2.



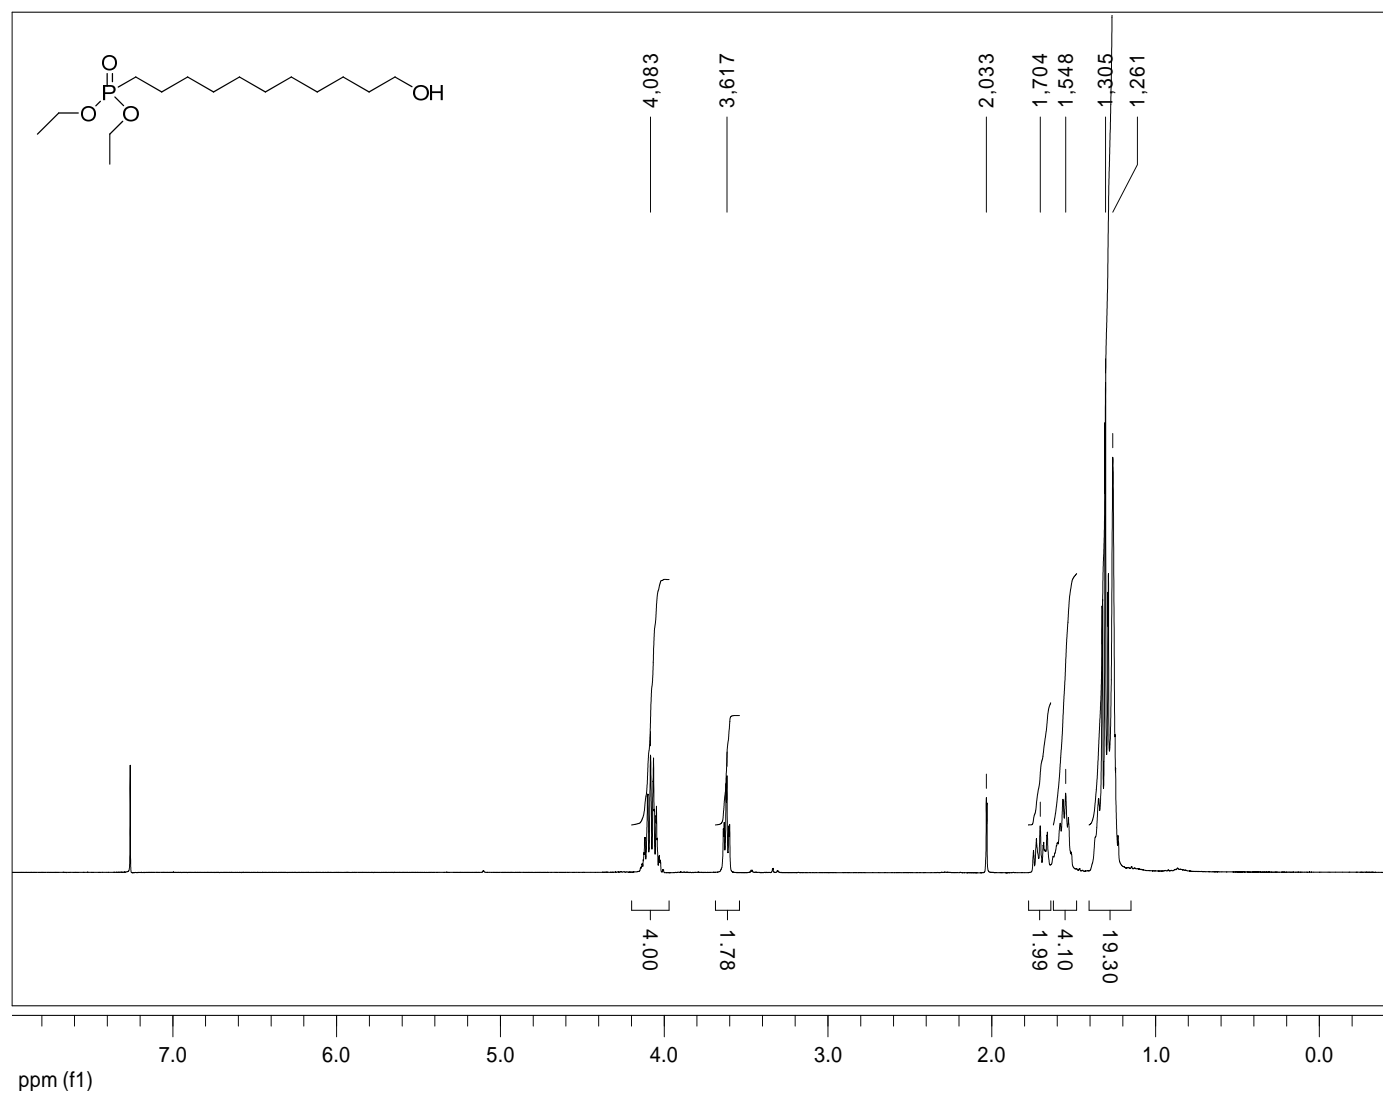

Figure S7. <sup>1</sup>H NMR spectrum **3** in chloroform.

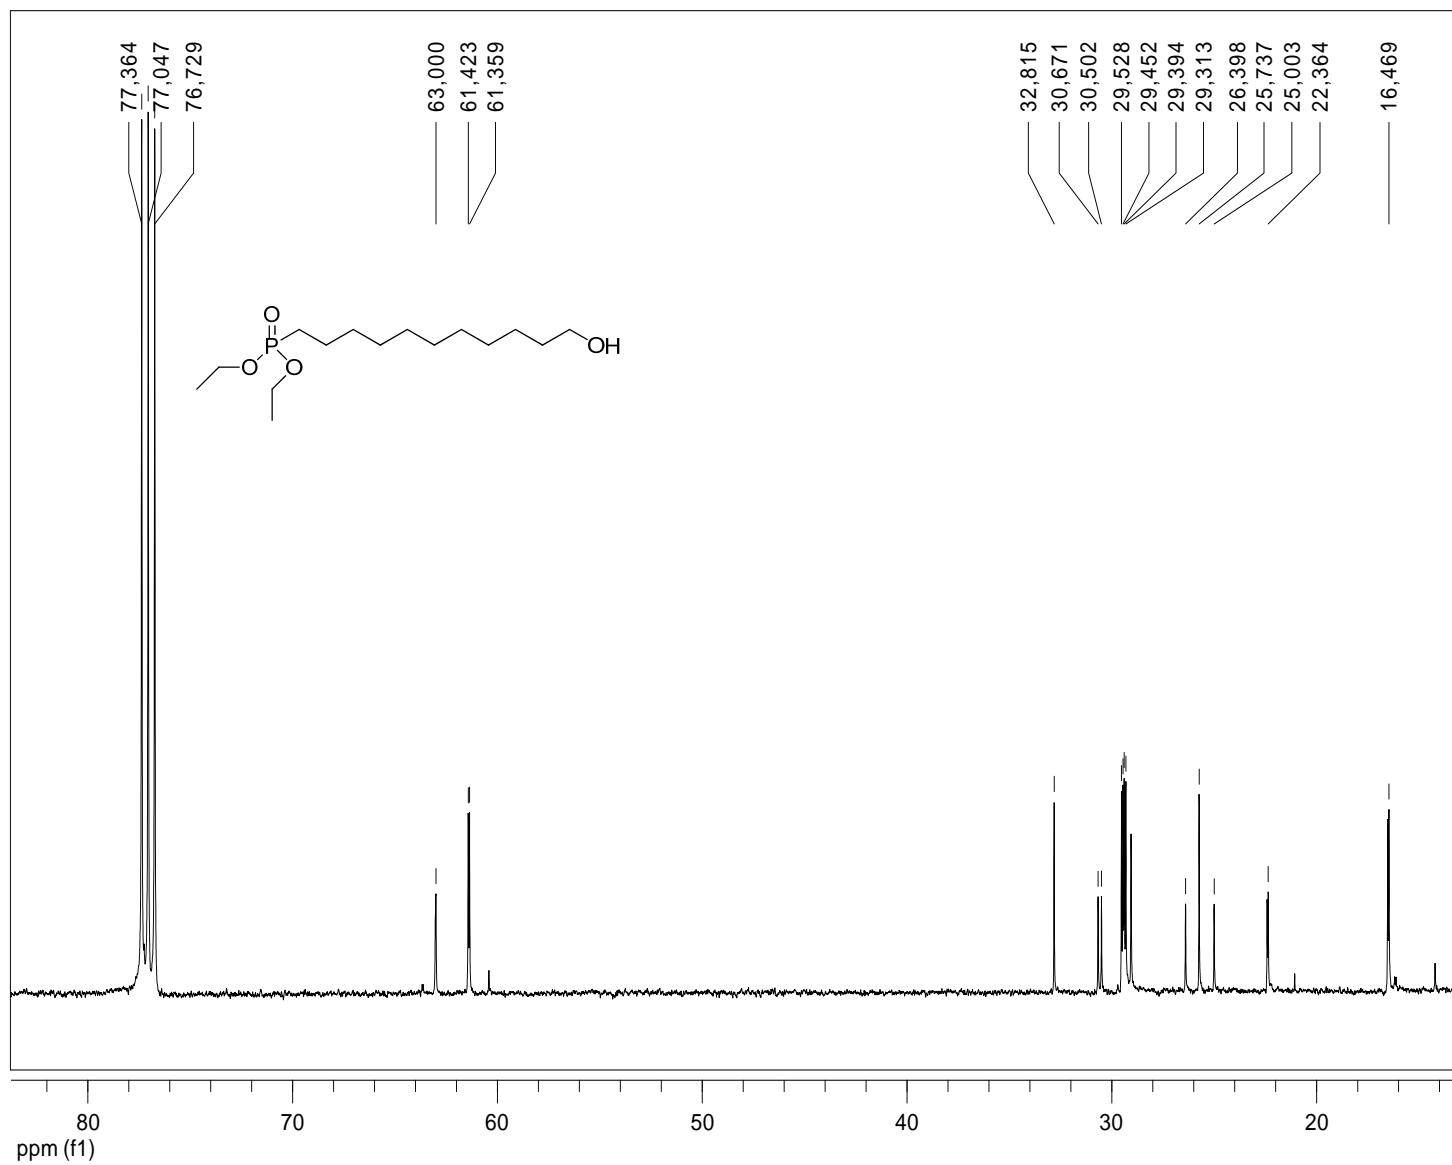

Figure S8.  $^{13}\text{C}$  NMR spectrum of **3** in chloroform.

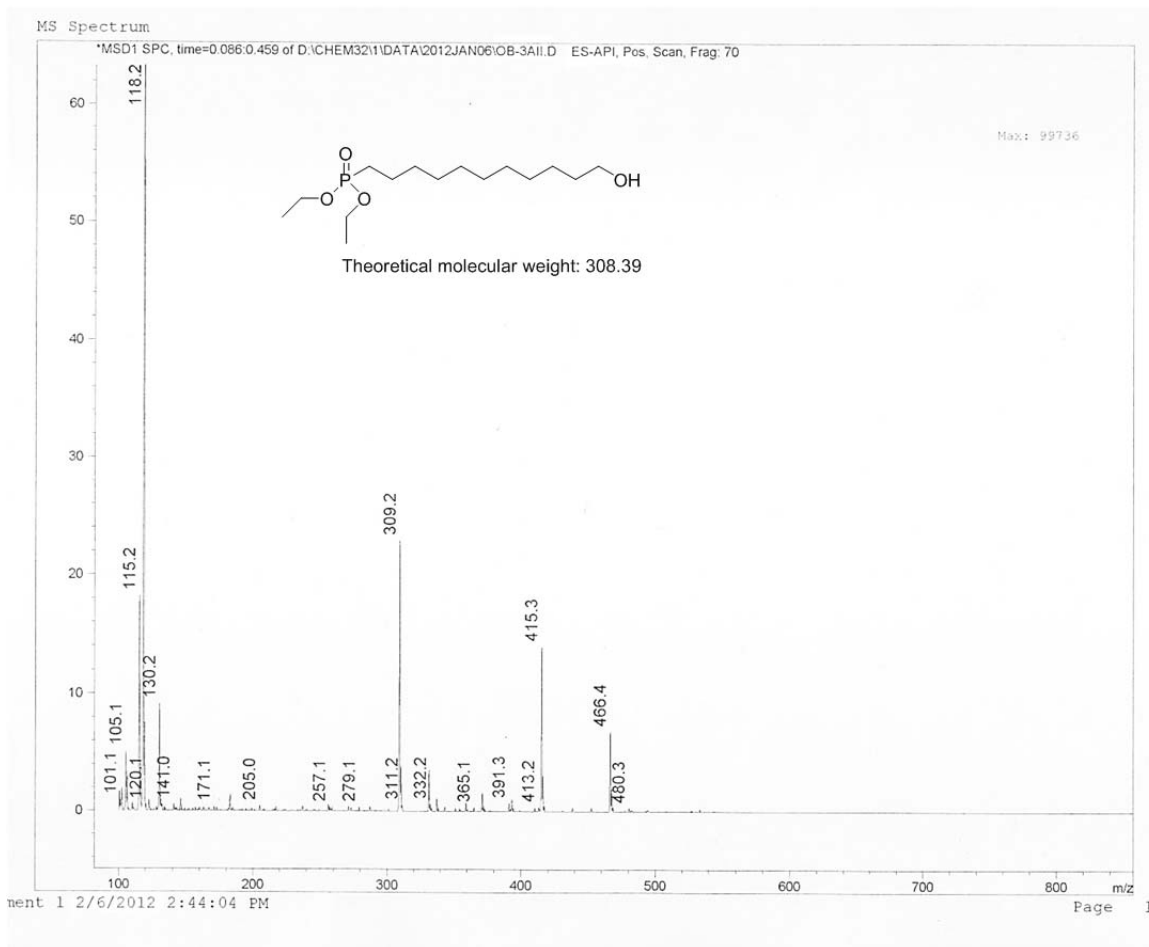

Figure S9. Mass spectrum of **3**.

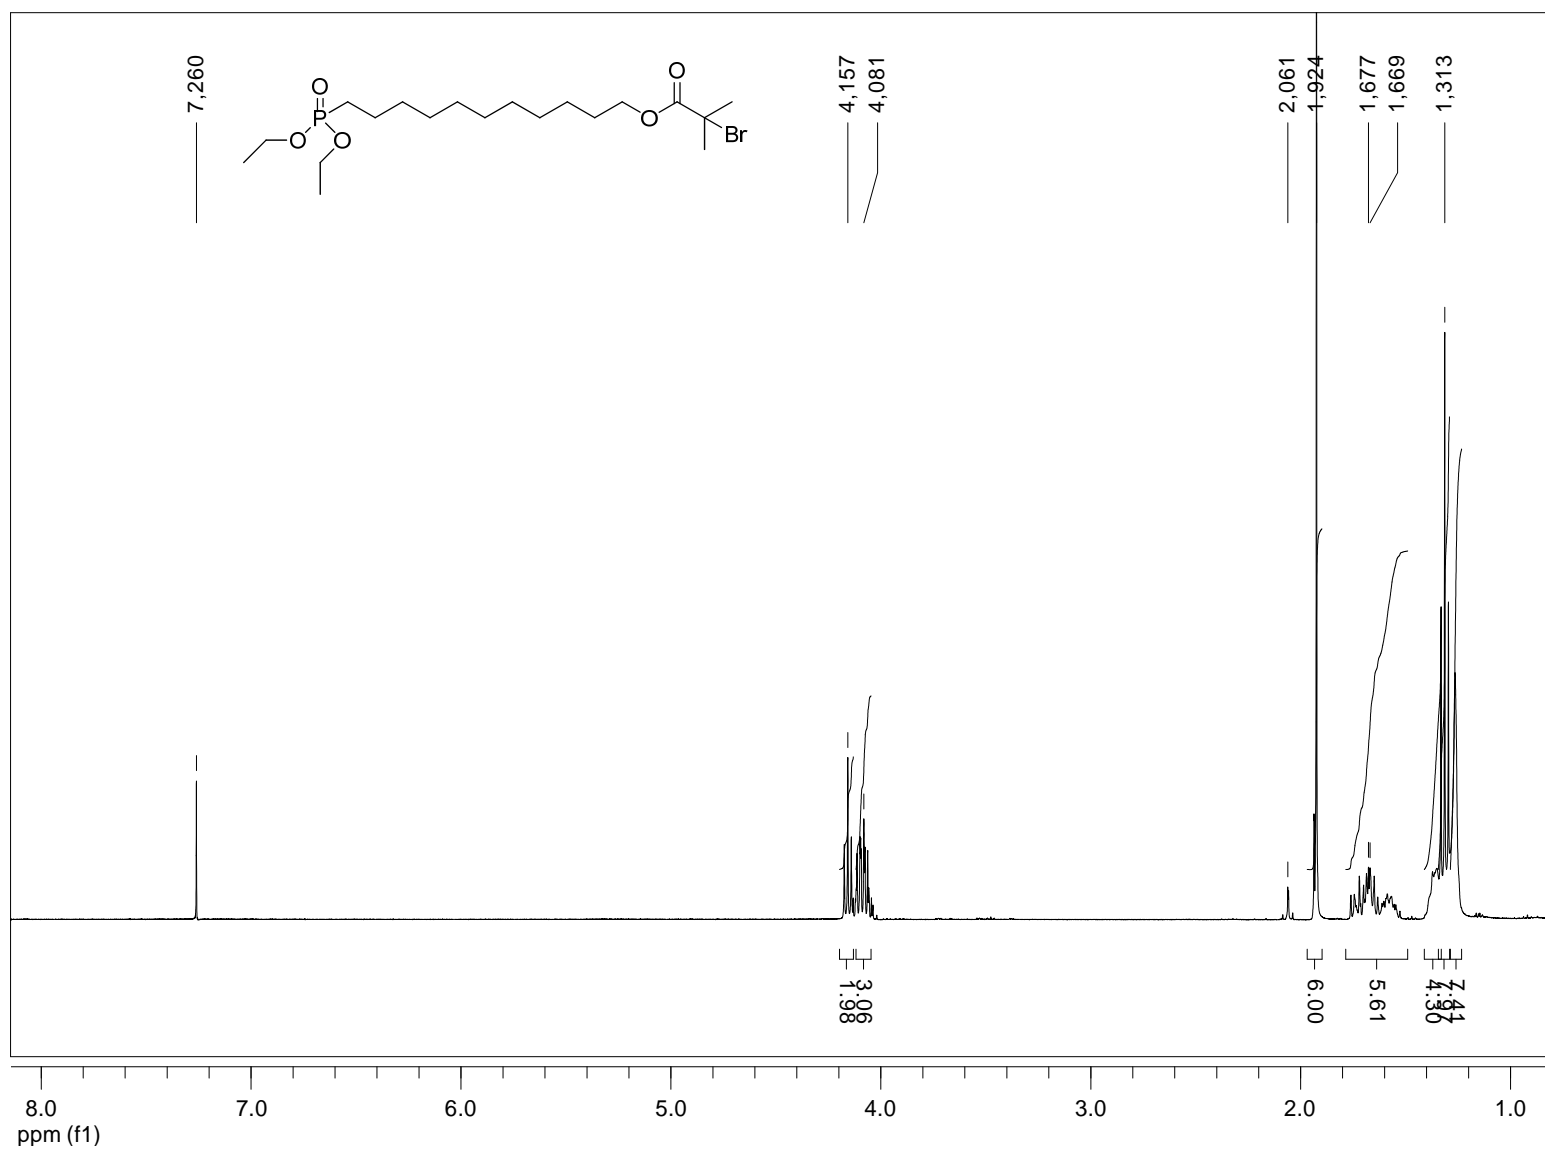

Figure S10. <sup>1</sup>H NMR spectrum of **4** in chloroform.

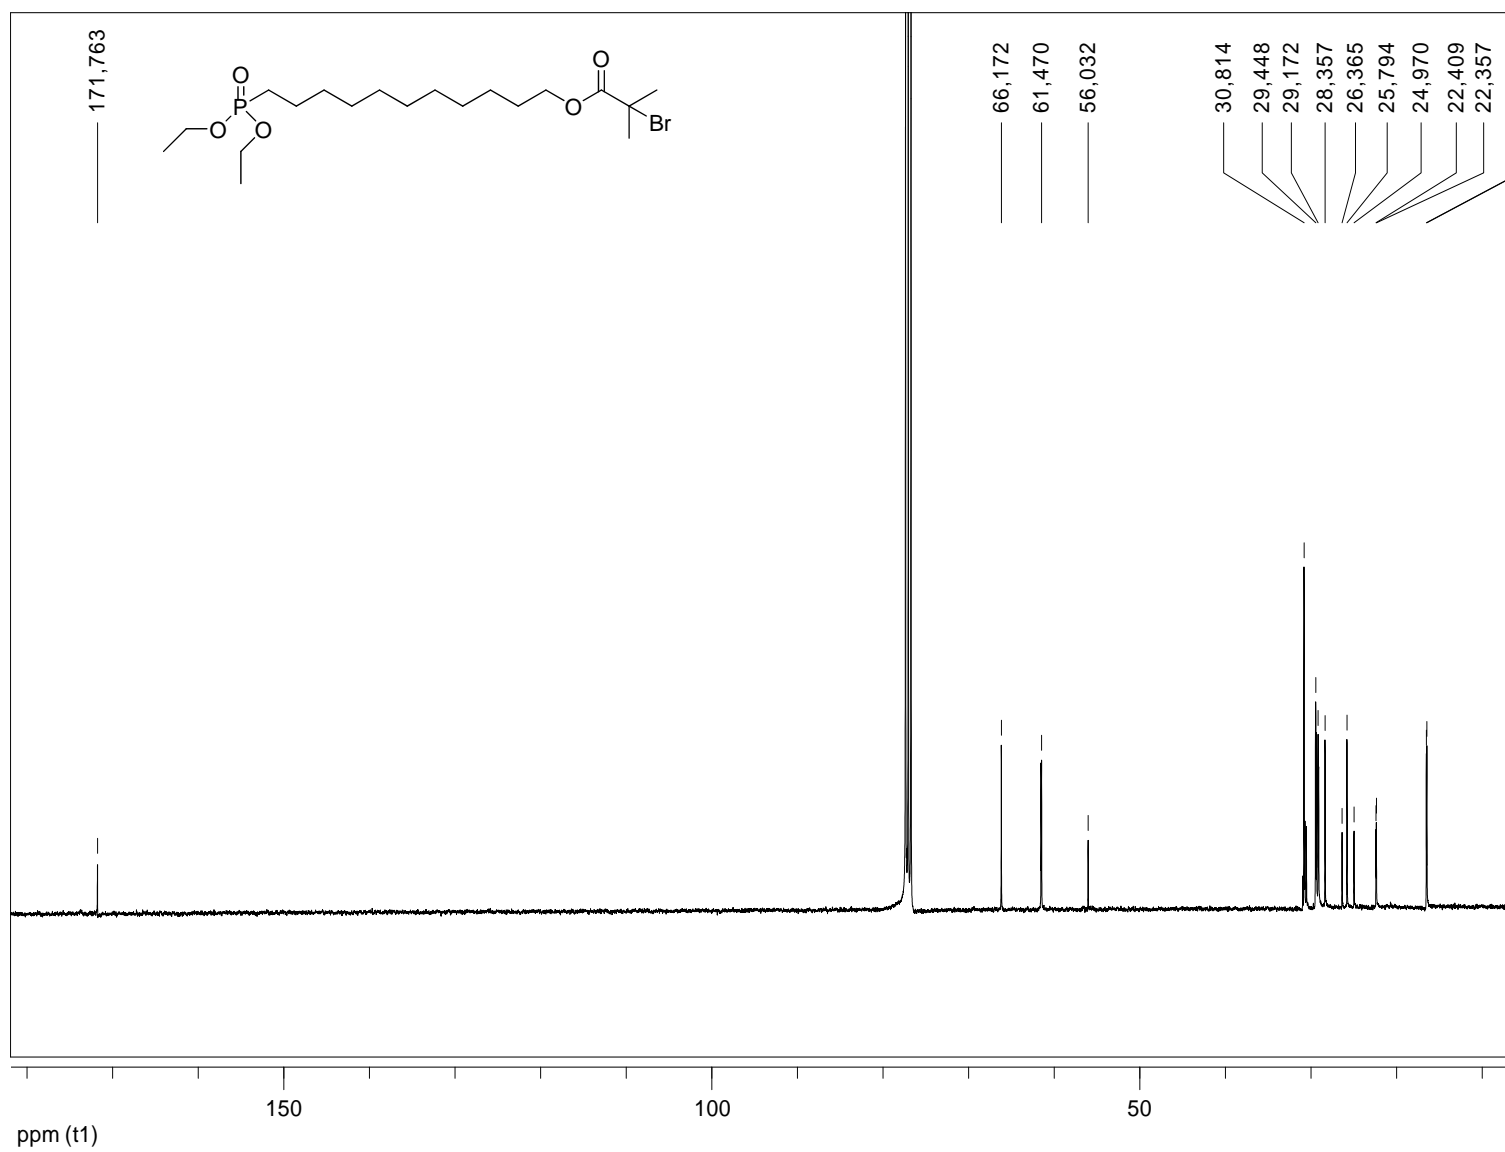

Figure S11.  $^{13}\text{C}$  NMR spectrum of **4** in chloroform.

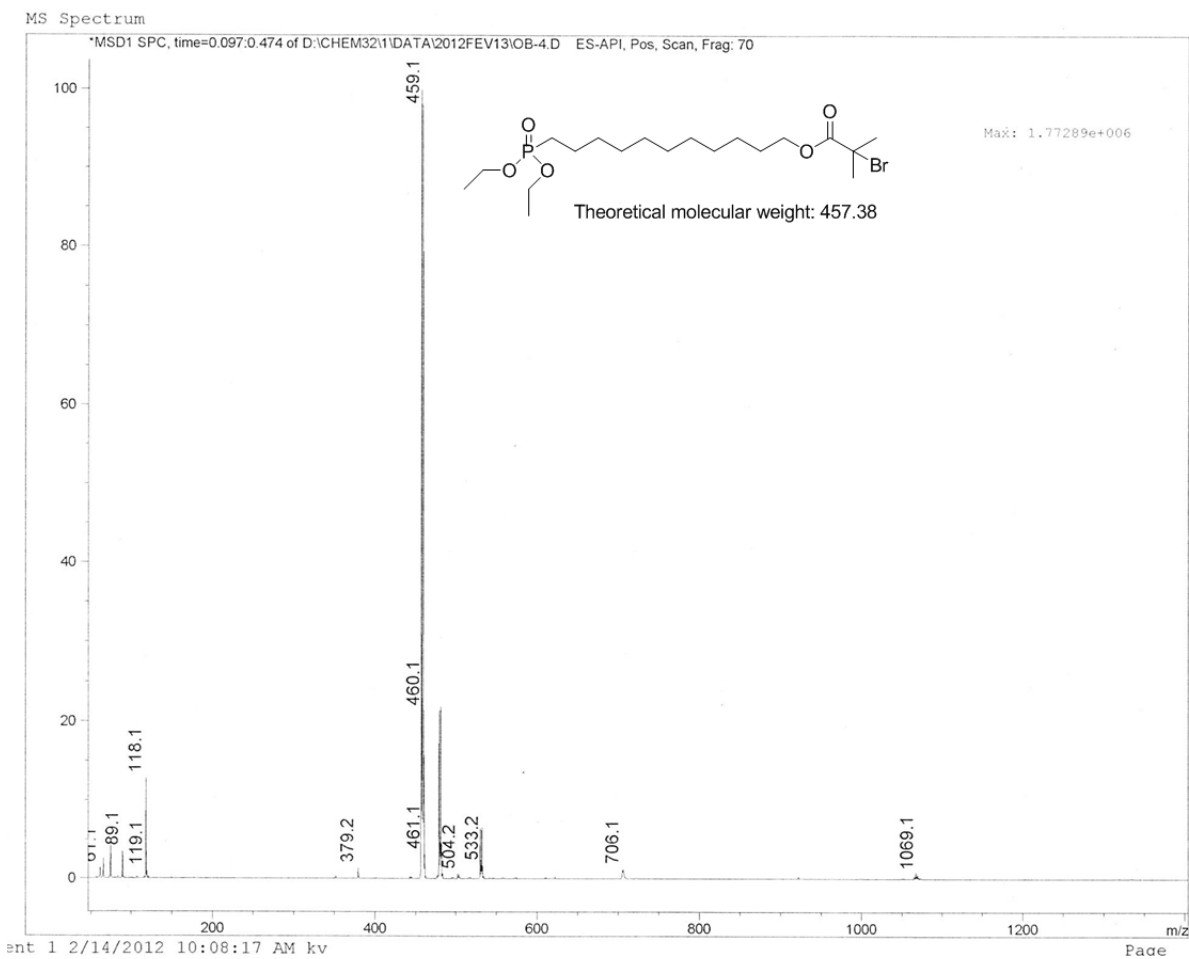

Figure S12. Mass spectrum of 4.

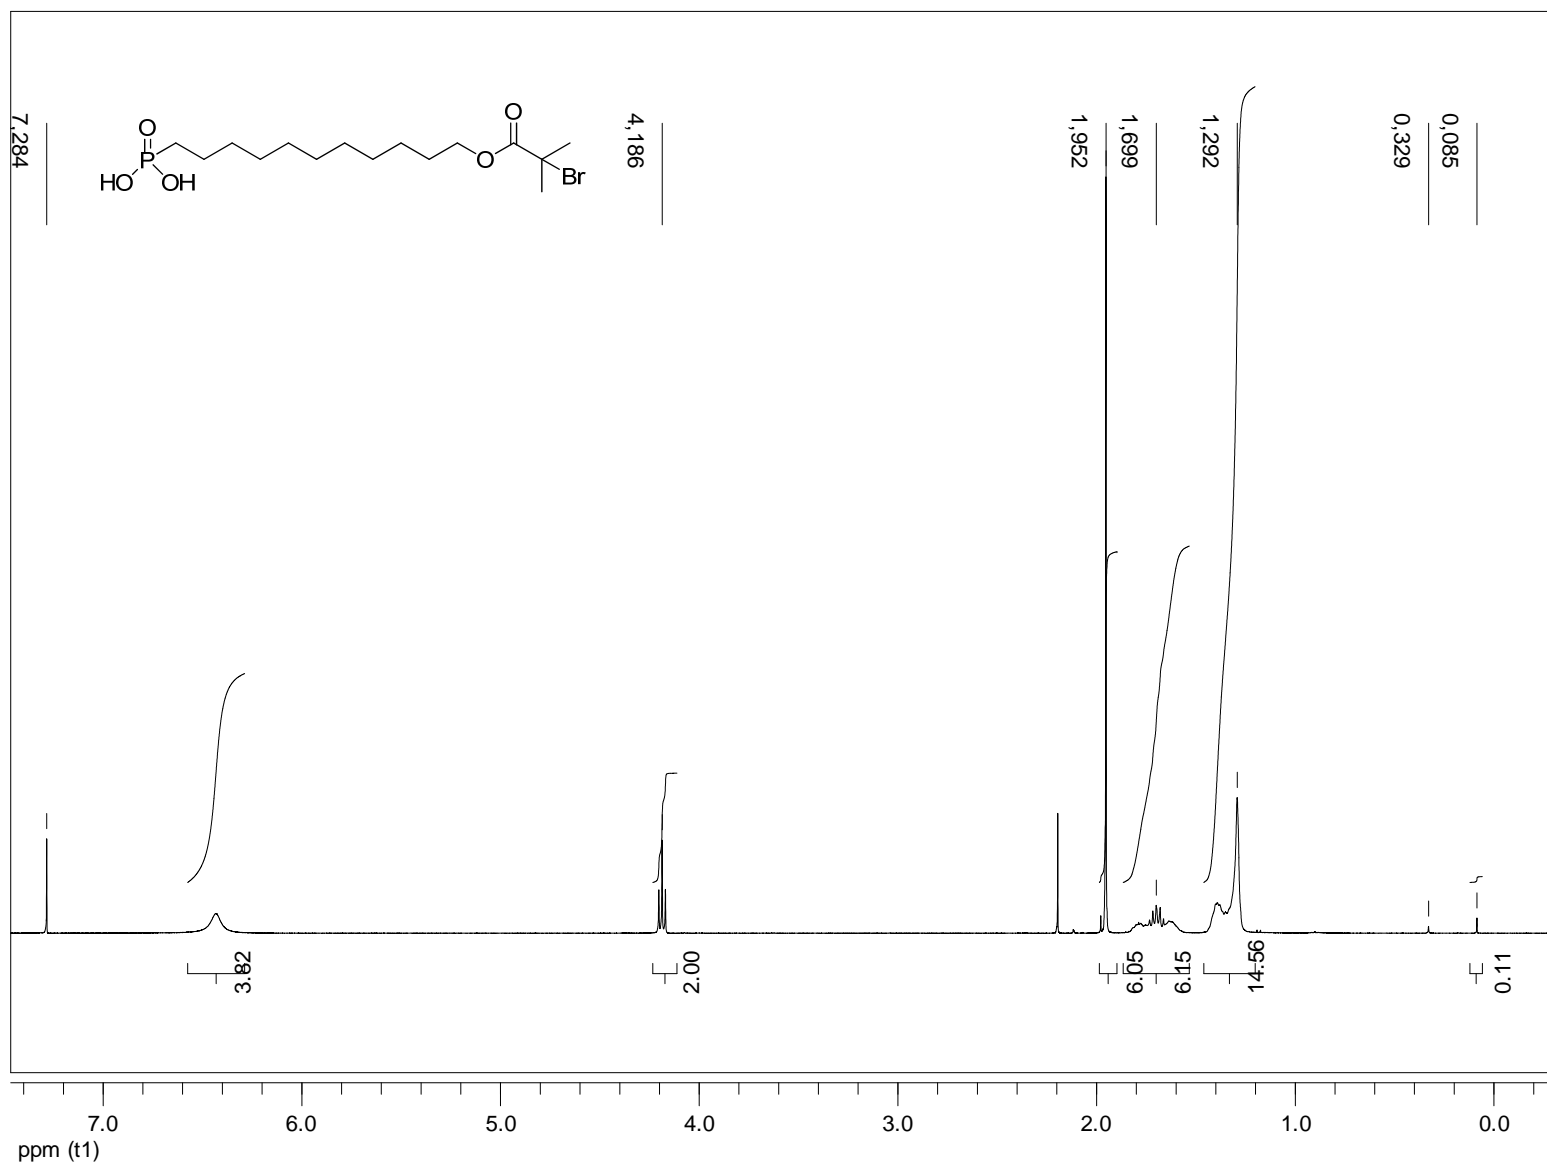

Figure S13. <sup>1</sup>H NMR spectrum of **5** in chloroform.

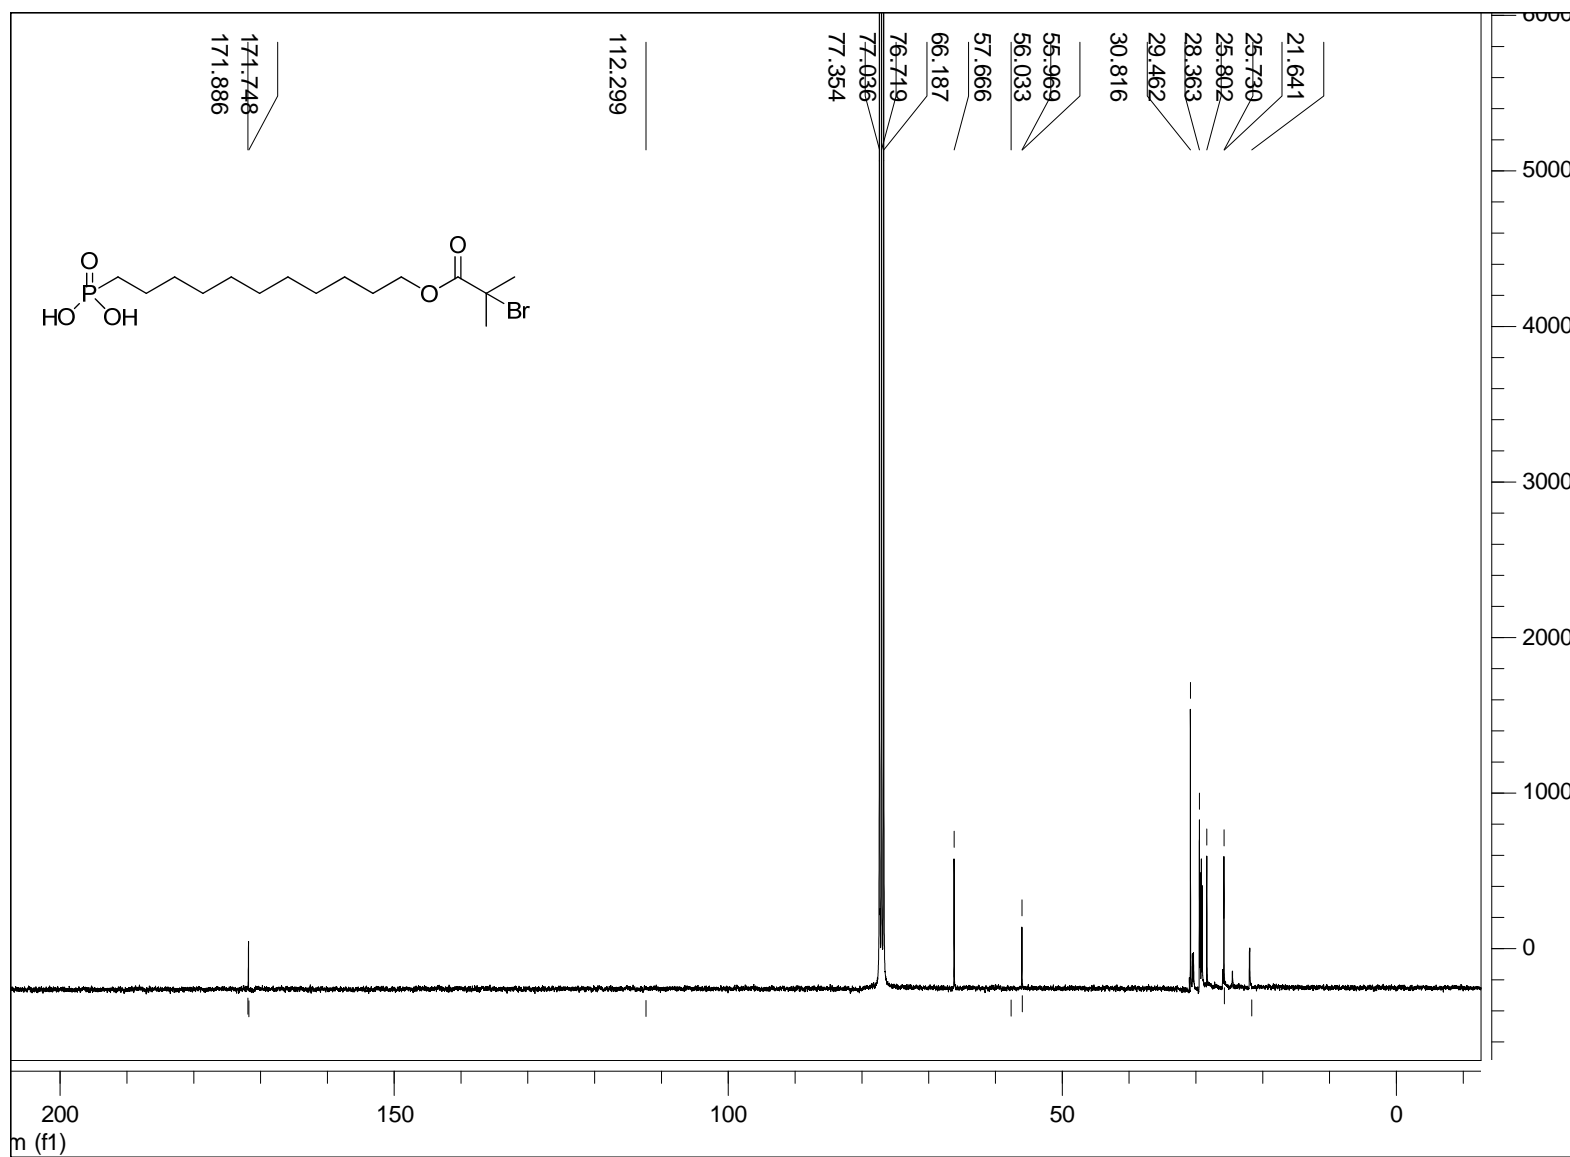

Figure S14.  $^{13}\text{C}$  NMR spectrum of **5** in chloroform.



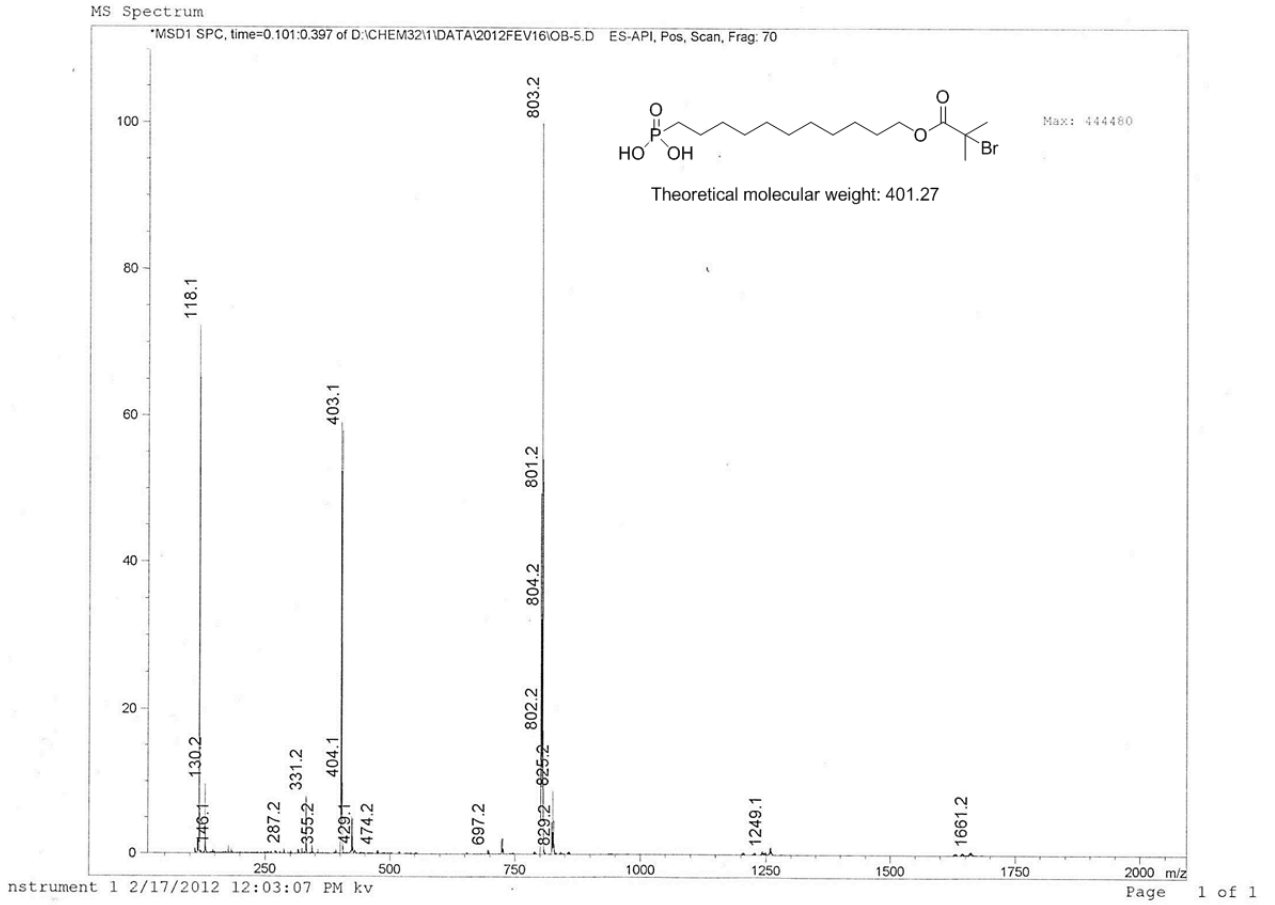

Figure S15. Mass spectrum of **5**.

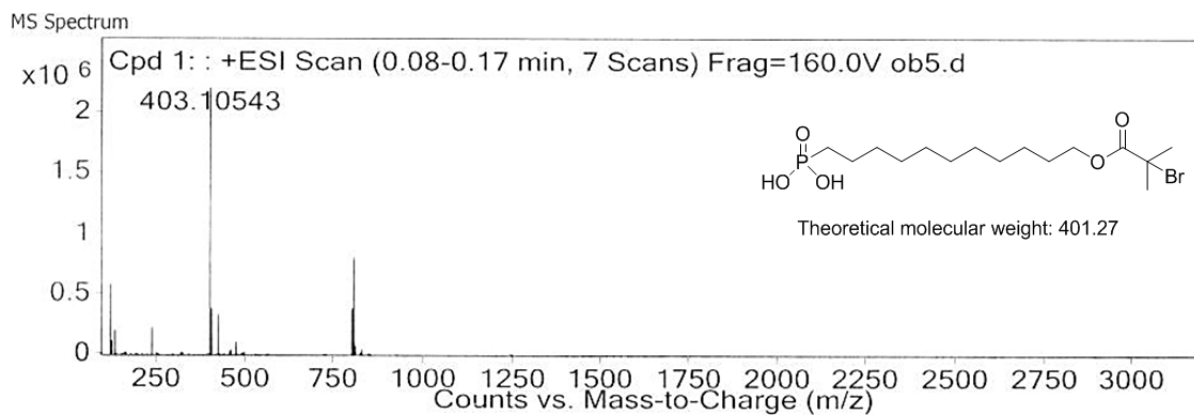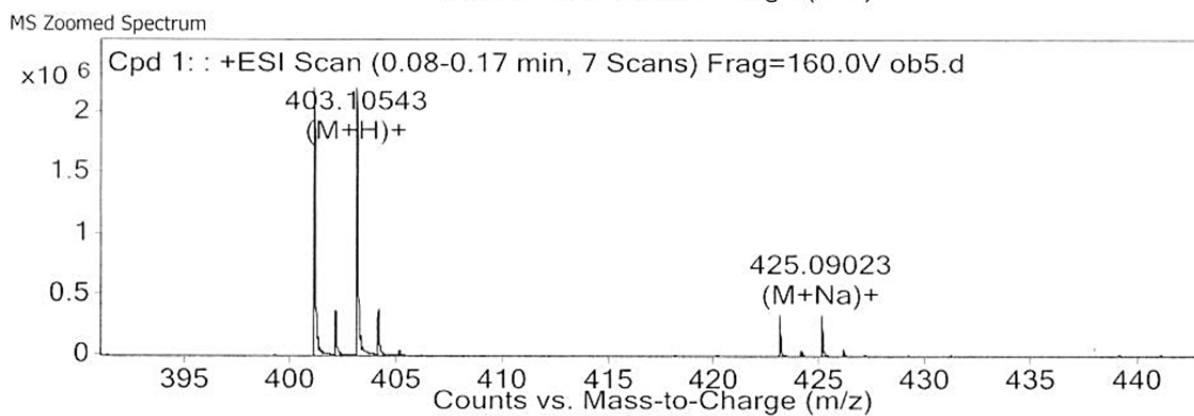

MS Spectrum Peak List

| Ion                 | Ion Formula                             | Abund     | Expe. m/z | Calc. m/z | Diff(ppm) |
|---------------------|-----------------------------------------|-----------|-----------|-----------|-----------|
| (M+H) <sup>+</sup>  | C <sub>15</sub> H <sub>31</sub> BrOSP   | 2244287.5 | 401.10728 | 401.1087  | -3.53     |
| (M+Na) <sup>+</sup> | C <sub>15</sub> H <sub>30</sub> BrNaOSP | 349695.1  | 423.09209 | 423.09064 | 3.41      |

Figure S16. High resolution mass spectrum of **5**.

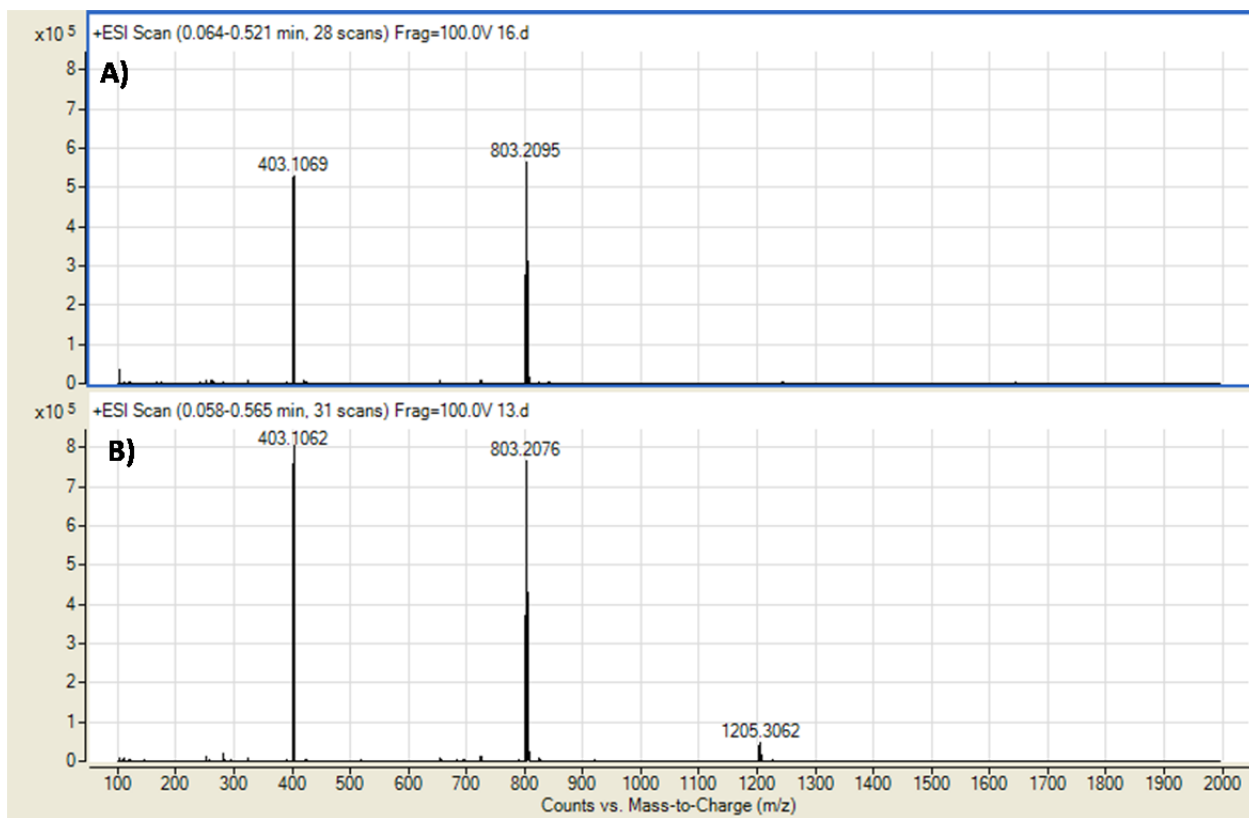

Figure S17. High resolution mass spectra of freshly synthesized **5** (B) after 5 recycling cycles.

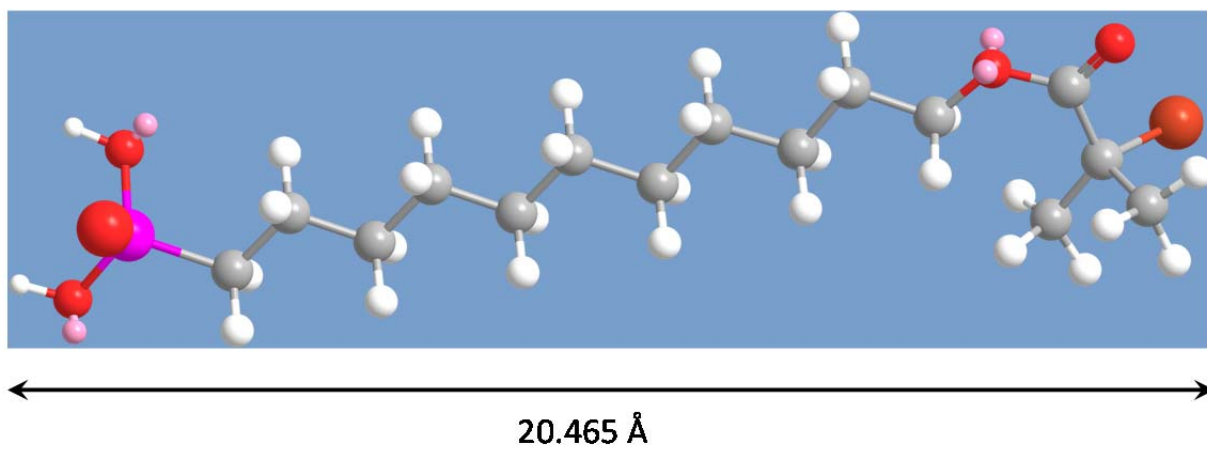

Figure S18. Theoretically calculated length of PI after energy minimization using Chem3D option MM2, with a RMS gradient of 0.100.

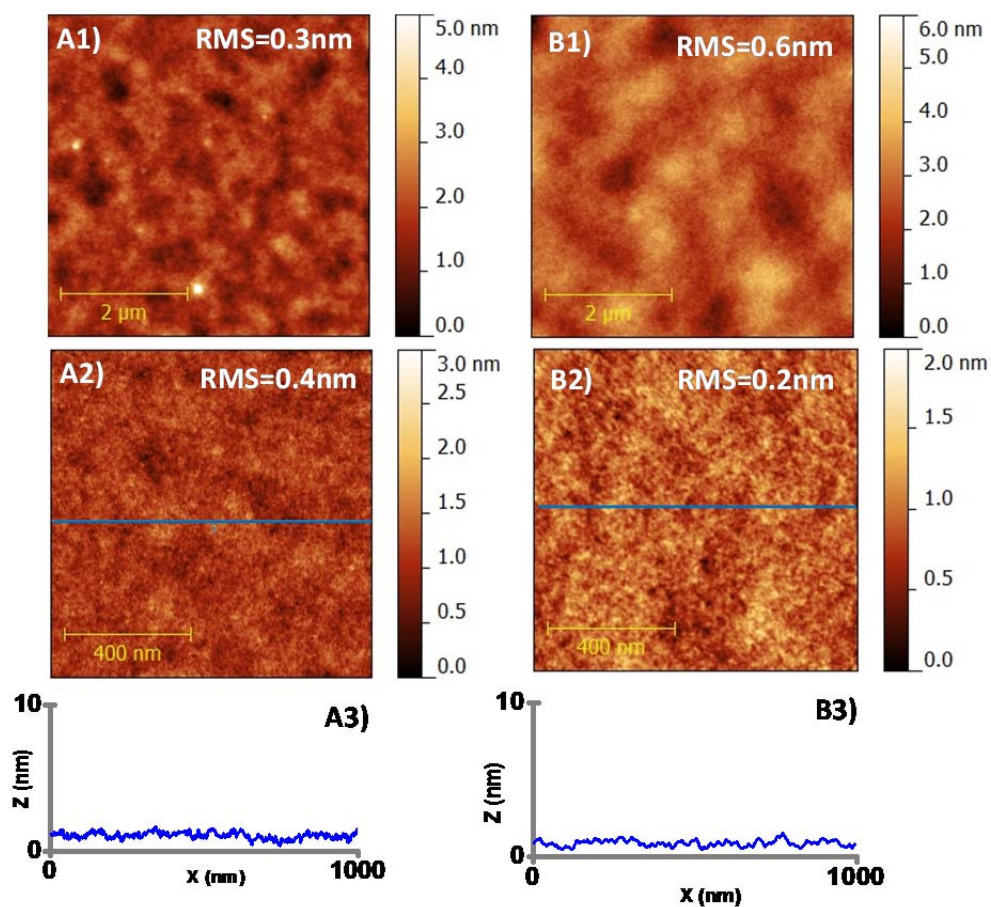

Figure S19. PAA (A) and PSPMA (B) brushes on silica. Polymer grafting reaction was performed with the conventional (siloxane) initiator. Thickness of PAA layer = 120 nm and PSPMA layer = 156 nm.

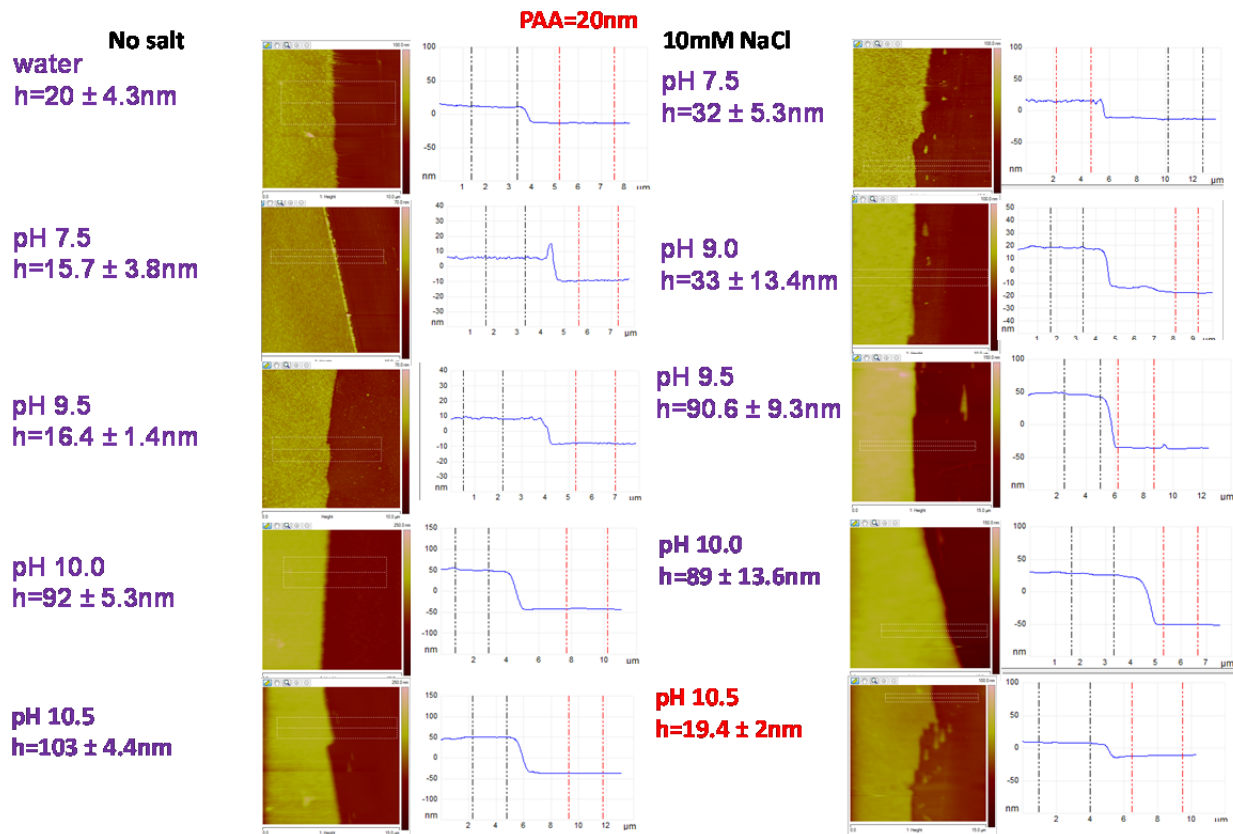

Figure S20. Degrafting studies of PAA brushes synthesized from PI-modified silica wafer.  
(thickness of PAA layer in air = 20nm)
